# Supplementary material
Source: Springer Nature journal article supplement (https://www.springermedizin.de/resource/supplementary/12874_2006_183_MOESM1_ESM.pdf/9433944)

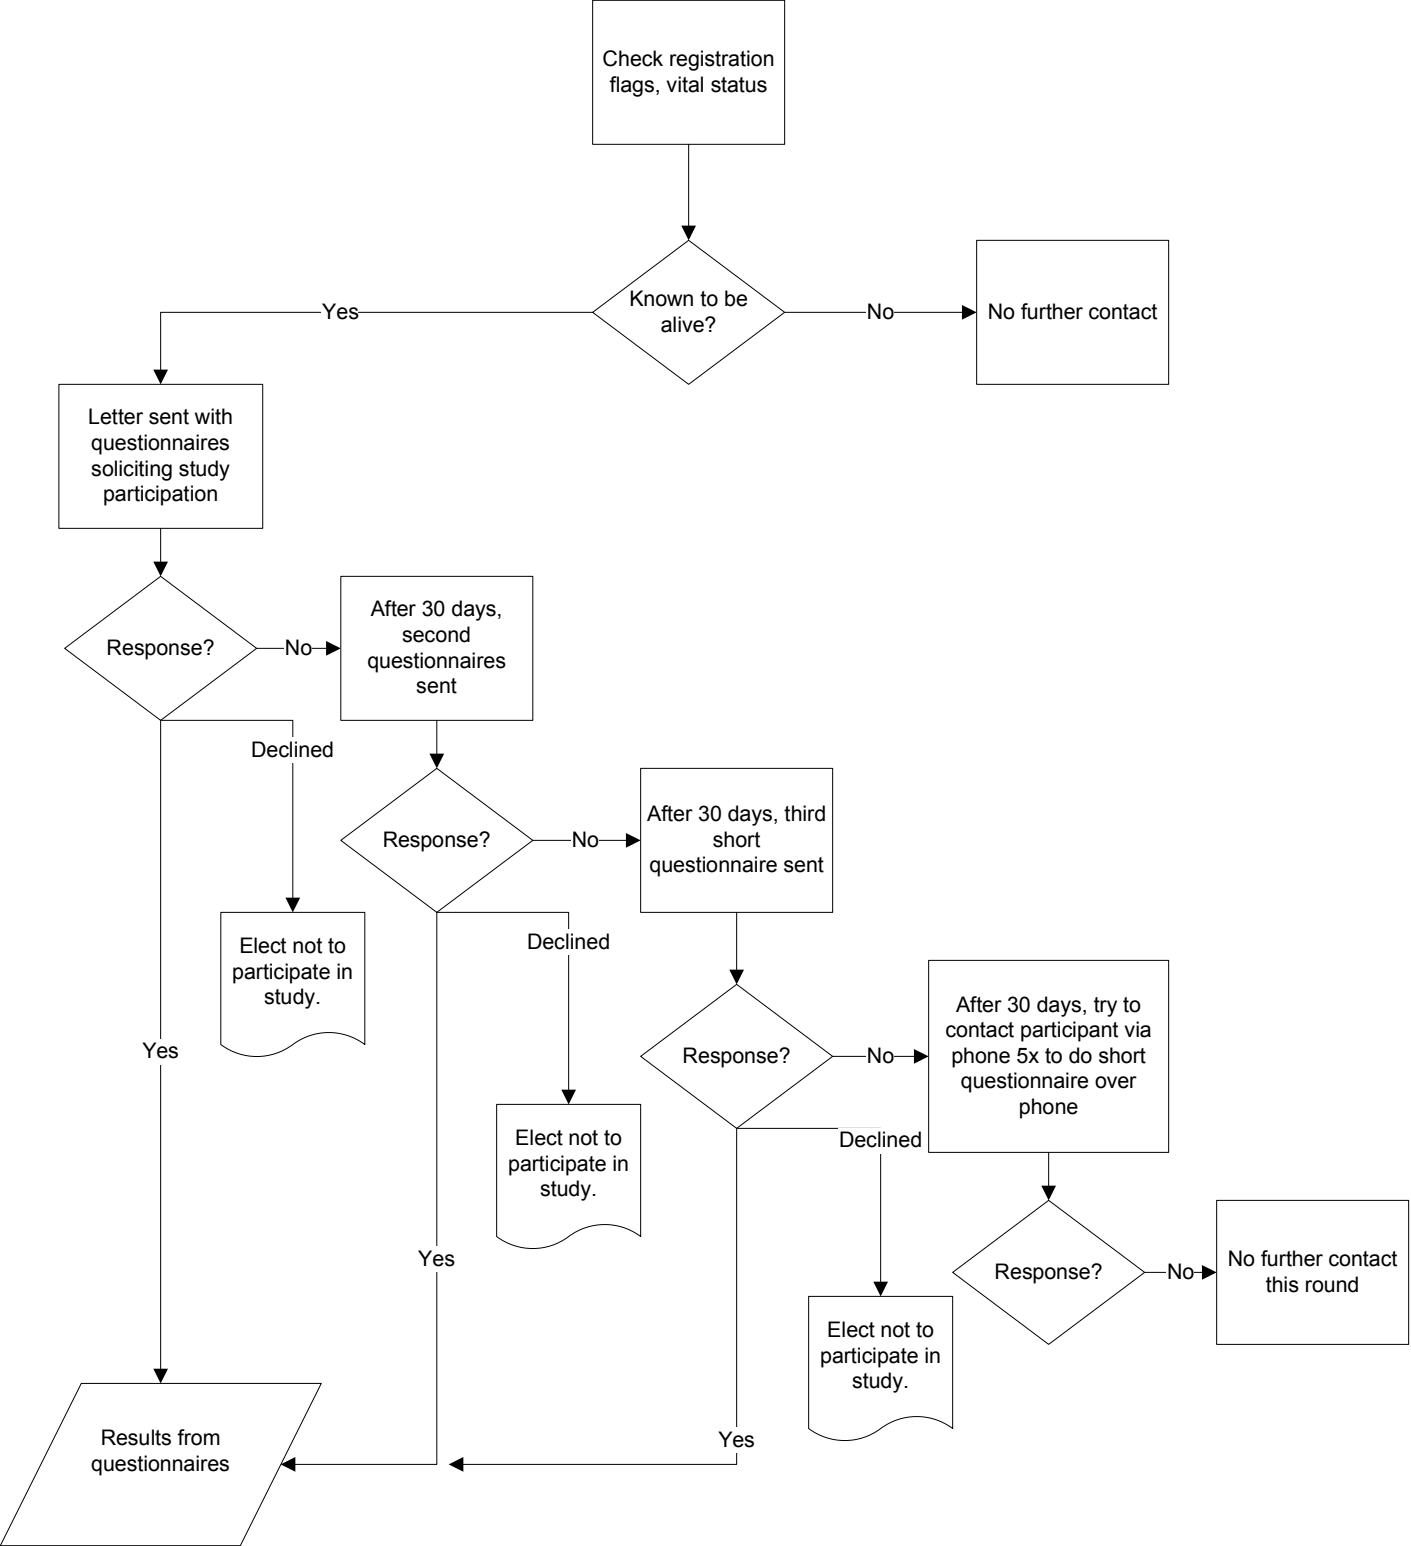

Supplement: MOESM1 [file 9433944]
